1 **Air pollution exposure, respiratory consequences, and perceptions among urban African children**  
2 **living in poor conditions – a case study in Abidjan, Côte d'Ivoire**

3

4 Short Title. Respiratory health and air pollution in African children

5

6 Auriane Pajot<sup>1\*</sup>, Marie Yapo<sup>2</sup>, Sarah Coulibaly<sup>2</sup>, Madina Doumbia<sup>3</sup>, Sylvain Gnamien<sup>2</sup>, Kouassi Kouao<sup>2</sup>,

7 Stéphane Ahoua<sup>2</sup>, Sonia Adjoua Dje<sup>6</sup>, Cathy Liousse<sup>4</sup>, Raoul Moh<sup>5</sup>, Joanna Orne-Gliemann<sup>1</sup>, Flore Dick

8 Amon Tanoh<sup>6</sup>, Olivier Marcy<sup>1¶</sup>, Véronique Yoboue<sup>2 ¶</sup>

9

10 <sup>1</sup>University of Bordeaux, Inserm U1219, Centre de recherche Bordeaux Population Health, France

11 <sup>2</sup>University Félix Houphouët-Boigny de Cocody, UFR des Sciences des Structures de la Matière et de

12 Technologie, Laboratoire des Sciences de la Matière, de l'Environnement et de l'énergie Solaire, 22 BP

13 582 Abidjan 22, Côte d'Ivoire

14 <sup>3</sup>Universty Peleforo Gon Coulibaly, BP 1328 Korhogo, Côte d'Ivoire

15 <sup>4</sup>Université Toulouse III Paul Sabatier, Observatoire Midi-Pyrénées, Toulouse, France

16 <sup>5</sup>Programme PACCI, Abidjan, Côte d'Ivoire

17 <sup>6</sup>Service de Pédiatrie, CHU d'Angré, 28 BP 1530 Abidjan, 28, Côte d'Ivoire

18 \* Corresponding author

19 E-mail: [auriane.pajot@u-bordeaux.fr](mailto:auriane.pajot@u-bordeaux.fr) (AP)

20

21

22 ¶These authors contributed equally to this work

**NOTE: This preprint reports new research that has not been certified by peer review and should not be used to guide clinical practice.**

## 23 Abstract

24 Air pollution can severely impact child lung health but is often not considered a public health priority  
25 by policy-makers and population in low-and-middle income countries. We did an interdisciplinary  
26 mixed method study to assess exposure to air pollution and respiratory health in children aged 5-10  
27 living in poorly condition in Yopougon, a district of Abidjan, Côte d'Ivoire, and parent and child  
28 perceptions and knowledge of air pollution. We assessed pollution exposure with indoor and outdoor  
29 PM<sub>10</sub> and PM<sub>2.5</sub> concentrations and questionnaires, children's respiratory health with ISAAC  
30 questionnaire, clinical evaluation, spirometry or RINT, depending on their ability to perform a forced  
31 expiration, their perception of air pollution with a "Draw and express yourself" activity and that of  
32 parents with semi-structured interviews and questionnaires. We enrolled 124 children from 65  
33 households, that used mixed cooking with gas and charcoal in settings with important environmental  
34 air pollution. Median 48-hour PM<sub>10</sub> and PM<sub>2.5</sub> concentrations were 126.7 (IQR: 82.7) and 60.8 (IQR:  
35 50.7) µg/m<sup>3</sup>, indoor respectively, and 113.4 (IQR: 64.2) and 58.2 (IQR: 36.9) µg/m<sup>3</sup>, outdoor in  
36 courtyards. 21 (16.9%) children reported wheezing in the previous year, 65 (52.4%) reported dry cough  
37 at night, and 63 (72.4%) had lung function impairment on spirometry with 24 (27.6%) asthma, 19  
38 (21.8%) non reversible obstruction and 20 (23.0%) restrictive pattern. Adults and children were able  
39 to identify visible sources of air pollution but largely ignored effects on health. Despite a high exposure  
40 to air pollution with particulate matter concentrations far exceeding WHO recommendations in this  
41 district of Abidjan, and a high prevalence of respiratory symptoms, lung function impairment and  
42 asthma, among children, children and adults, perception of air pollution as a health issue was very  
43 limited. Recommendations and awareness-raising for parents and children, starting at primary school  
44 level, are needed to limit the exposure to and respiratory consequences of air pollution.

45

46 Key words: air pollution, biomass combustion, respiratory health, children, Ivory Coast

47

## 48 Introduction

49 Air pollution is a growing environmental concern, and a major global health threat. According to the  
50 World Health Organization (WHO), exposure to ambient (outdoor) and household (indoor) air pollution  
51 causes 7 million premature deaths every year, and the loss of millions of years of healthy life [1]. In  
52 2019, 99% of the world's population lived in areas where air pollutant concentration exceeds WHO  
53 recommended air quality thresholds. In adults, air pollution is responsible for chronic respiratory  
54 diseases such as chronic obstructive pulmonary disease (COPD) and lung cancer, as well as cardio- and  
55 cerebro-vascular diseases [2–4]. In 2019, 89% of premature deaths due to outdoor pollution occurred  
56 in low- and middle-income countries (LMIC) [1].

57  
58 Populations from LMIC are largely exposed to air pollution, particularly household pollution caused by  
59 the use of low-cost, accessible biomass fuels for cooking and heating [5–9]. By 2019, almost 3 billion  
60 people were using biomass fuels such as wood, coal, animal dung, agricultural residues and oil to cook,  
61 heat and light their homes [10]. In 2019, only 19% of the population in the African region had access  
62 to clean energy, compared to 90% in the European and American regions [11]. The use of biomass fuels  
63 in poorly ventilated homes, combined with inefficient cooking methods, exposes people to Particulate  
64 Matter (PM) concentrations that are sometimes 100 times higher than the thresholds recommended  
65 by the WHO [10,12]. PM include microscopic matter suspended in the air, mainly resulting from the  
66 use of biomass as a fuel. These are fine particles with diameters of less than 10  $\mu\text{m}$  ( $\text{PM}_{10}$ ) and 2.5  $\mu\text{m}$   
67 ( $\text{PM}_{2.5}$ ) [13]. Inhaled in large quantities, they increase cardiopulmonary morbidity and mortality [14].

68  
69 Children are particularly vulnerable to the effects of pollution [15–17]. They are more sensitive to  
70 atmospheric pollutants. Their organs are immature, and they have a higher respiratory rate than  
71 adults, inhaling more air and therefore more  $\text{PM}_{2.5}$ ,  $\text{PM}_{10}$  and other pollutants responsible for  
72 consequences on lung development, limitation of pulmonary function, respiratory infections and

73 aggravation of asthma [2,3] [15–17]. In 2016, approximately 543,000 deaths of children under 5 and  
74 52,000 deaths of children aged 5 to 15 were attributed to household and outdoor air pollution [18].  
75 Exposure to household air pollution, particularly from burning biomass in open fireplaces, increases  
76 the risk of pneumonia [10,19–21], of cough accompanied by reported rapid breathing or difficulty  
77 breathing in children [22–28] and low birth weight [29,30]. Children under 5 are at least 60 times more  
78 likely to die from exposure to air pollution in low-income countries than in high-income countries [31].  
79 Despite the high burden of non-communicable and communicable diseases due to air pollution, these  
80 are rarely considered as public health priorities in low and middle-income countries, still facing the  
81 heavy burden of pandemic infectious diseases such as HIV, malaria, and tuberculosis. Pollution  
82 legislation is weak or unenforced. For most countries in sub-Saharan Africa, there is a lack of ambient  
83 air quality monitoring, combined with insufficient capacity to collect population health data, which are  
84 major barriers to evidence-based intervention research on the subject [32,33]. People in low- and  
85 middle-income countries are more exposed to pollution, especially the poorest populations [34]. These  
86 are also the populations with the least knowledge on air pollution [33,35].

87

88 In Côte d'Ivoire, outdoor air pollution is mainly due to anthropogenic activities such as burning of  
89 dumped waste in open air, fish smoking activities... [7,36,37]. With urbanization and urban sprawl,  
90 there has been a sharp loss in green spaces, and homes are being built close to industries, exposing  
91 people to pollution. The use of outdated vehicles, with an old fleet of vehicles using mostly low-quality  
92 fuel, is one of the main sources of outdoor air pollution. Urban air in Côte d'Ivoire is also full of dust in  
93 suspension due to the poor quality of the roads [6,38,39]. Several studies carried out between 2005  
94 and 2020 showed that PM<sub>2.5</sub> concentration levels were 3 to 15 times higher than WHO recommended  
95 thresholds, with the highest levels found in low-income neighborhoods [6,40]. As part of the CHAIRPOL  
96 (Urban air pollution and non-communicable diseases in ecohealth) program, a study carried out in  
97 2016-2017 in poorly living condition households of Yopougon, a high-density area of Abidjan, showed

98 a high use of biomass fuel, a high level of PM<sub>2.5</sub> pollution in the air, and symptoms suggestive of asthma  
99 in children [41].

100

101 We sought to describe exposure to air pollution, respiratory health, and to understand the perception  
102 of pollution in a disadvantaged urban environment in Abidjan, Côte d'Ivoire, among children aged 5 to  
103 10 and their parents. This interdisciplinary work could help to understand pollution phenomena and  
104 find concrete solutions to protect exposed populations and improved their quality of life.

105

## 106 **Methods**

### 107 **Study design**

108 The SEPol-CI study was a multidisciplinary cross-sectional study with enrollments conducted between  
109 June 23 and August 25, 2022. It involved various research teams in public health/epidemiology,  
110 atmospheric physics and chemistry, sociology, pediatric pulmonology, focusing on children aged 5 to  
111 10, living in disadvantaged urban environments. The study used quantitative and qualitative methods,  
112 including measurements of PM<sub>10</sub> and PM<sub>2.5</sub> inside and outside the children's homes, exposure to air  
113 pollution and knowledge questionnaires, the standardized International study of asthma and allergies  
114 in childhood (ISAAC) questionnaires on asthma and a questionnaire on respiratory health, clinical  
115 assessment and respiratory function tests among children, in-depth interviews with children and their  
116 parents about air pollution perceptions and the "Draw and express yourself " activity for children.

### 117 **Study setting**

118 We carried out the study in Andokoi, a district of Yopougon, the most densely-populated suburb of  
119 Abidjan, capital city of Côte d'Ivoire. Andokoi is a working-class neighborhood located North of  
120 Yopougon, on the edge of the Banco forest, close to an industrial zone [41]. Proximity to the protected  
121 forest encourages local residents to exploit these resources illegally with intensive logging, and  
122 harvesting of various forest products [41]. The majority of men work in the industrial zone, while the

123 women have informal jobs and activities as shopkeepers in the surrounding area [41]. Andokoi is one  
124 of Yopougon's main garbage dumping and septic tank emptying sites [42]. We selected Andokoi for  
125 this study, as exposure to pollution and its impact on respiratory health had been studied previously  
126 in this neighborhood during the CHAIRPOL program in 2016-2017 [41].

127

## 128 Study population and sample size

129 We enrolled children aged between 5 and 10 years with informed consent signed by a parent or  
130 guardian and an assent signed for children over 7 years. Assuming 2 children per household in the 5-  
131 10 age group, the sample size was based on a convenience sample of around 100 children. A household  
132 was defined as all persons living under the same roof. A sub-sample of 10 adults with at least one child  
133 included in the study was targeted for the qualitative interviews.

134

## 135 Study procedures

136 Data was collected from June to September 2022. We based ourselves on the list of households that  
137 had participated in the previous study (Kouao, 2020) [41]. A number of new households were also  
138 included base on willingness to participate to complete our population in the same area of the previous  
139 study. Data from questionnaires were collected on a digital tablet by an investigator.

140 Data on sources of exposure, characteristics of houses and living environments, were collected from  
141 questionnaire, developed by a multi-disciplinary team on the basis of the questionnaire constructed 5  
142 years ago during the study (Kouao, 2020) [41]. This data was supplemented by measurements of PM  
143 concentrations. Concentrations of PM<sub>2.5</sub> and PM<sub>10</sub> were measured every two minutes over a 48-hour  
144 period, using two Aéroqual sensors located inside and outside homes. Measurements of PM  
145 concentrations were retrieved from the database and analysed by aerology students from the LASMES  
146 laboratory in Abidjan. To ensure proper calibration of the devices and consideration of environmental

147 conditions during pollution measurements, correction factors have been applied to the  
148 concentrations.

149 Data from the children's health questionnaire included the first part of the standardised ISSAC  
150 questionnaire (International study of asthma and allergies in childhood), the list of respiratory  
151 symptoms and signs and the history of respiratory illness. Health questionnaire was supplemented by  
152 respiratory function tests, and a physician's recording of clinical signs and vital parameters.  
153 Respiratory function tests were carried out by a medical doctor, spirometry measurements were taken  
154 in children aged 5 and over, and airway interruption resistance (Rint) were performed in younger  
155 children. It is a non-invasive test, easily performed on young children who are not able to produce the  
156 forced expirations required for spirometry. Vital parameters were measured by a nurse.

157

158 Semi-structured interviews were conducted with the parents of the children included in the study to  
159 supplement the data collected by questionnaire and to understand individuals' perceptions of air  
160 pollution. The interviews were conducted according to an interview guide and recorded by a trained  
161 interviewer, in a space away from the homes to facilitate discussion and privacy.

162

163 The perception of air pollution among adults was surveyed using questionnaires and semi-structured  
164 interviews with a smaller sample of parents. The "Draw and express yourself" activity was used to  
165 understand children's perceptions of air pollution [43]. In this method, children are asked to draw on  
166 a specific topic on a blank sheet of paper and then debriefed on what they have drawn, supplementing  
167 these explanations with semi-directive questions. The "draw-then-explain" method, has already been  
168 carried out in Morocco with children aged 7 to 12 [43].

169

## 170 Main respiratory health outcomes and definitions

171 The primary respiratory outcome was defined as the presence of respiratory symptoms and/or lung  
172 function impairment (LFI). We considered as respiratory symptoms asthma symptoms as defined by

173 the ISAAC questionnaire, presence of wheezing in the last 12 months, history of asthma attack,  
174 wheezing in the chest during or after exercise (last 12 months), dry cough at night (last 12 months)  
175 [44]. The respiratory function was determined using a Spirodyn pneumotachograph.  
176 LFI was defined by the presence of spirometric abnormalities characterized by either obstructive  
177 (OVD), restrictive (RVD) or mixed ventilatory disorders. Definitions of LFI in children are not as clear-  
178 cut as in adults [45,46]. A non-reversible OVD was defined by a FEF<sub>25-75</sub> < 70% of the theoretical value  
179 and/or FEV<sub>1</sub> < 80% of the theoretical value and non-reversible on the bronchodilator reversibility test.  
180 A RVD was defined by an FVC < 80% and FEF<sub>25-75</sub> and or normal FEV<sub>1</sub> (≥ 80%). A mixed disorder was  
181 characterized by FVC < 80%, FEF<sub>25-75</sub> < 70% and or FEV<sub>1</sub> < 80%. In children unable to underwent a full  
182 spirometry OVD on spirometry was defined as a Rint > 150% of the theoretical value with reversibility  
183 of obstruction objectified by a decrease in Rint ≥ 35% of the predicted value after reversibility testing.  
184 Asthma was defined by a reversible OVD with a FEV<sub>1</sub> greater than 12% of baseline on post-test  
185 reversibility to bronchodilatator.

186

## 187 Other health outcomes

188 Children's health data included: clinical signs on auscultation by a physician, respiratory symptoms and  
189 history, vital parameters, spirometric parameters, and Rint measurements. The spirometric  
190 parameters collected were: forced vital capacity (FVC), forced expiratory volume in one second (FEV<sub>1</sub>),  
191 Tiffeneau's ratio (FEV<sub>1</sub>/FVC) and mean mid-expiratory flow of FVC (FEF<sub>25-75</sub>). The Rint parameter  
192 collected was specific airway resistance in kPa/l/s (sRaw), which measures total pulmonary resistance  
193 [47].

194

## 195 Pollution exposure and perceptions outcomes

196 Exposure to air pollution was characterized by sources of pollution exposure, housing characteristics,  
197 and average daily household and outdoor PM<sub>2.5</sub> and PM<sub>10</sub> concentrations. Perceptions of air pollution



198 among children and adults included: understandings of air pollution sources, health and environmental  
199 consequences, solutions, informations and prioritisations to the problem.

200

## 201 **Data analysis**

### 202 **Quantitative data analysis**

203 We describe dwelling and household characteristics and potential sources of pollutants in the home  
204 and related to lifestyles, children's demographic and medical data, respiratory function test data and  
205 adults' perceptions and knowledge of air pollution. We averaged PM<sub>2.5</sub> and PM<sub>10</sub> data collected  
206 households and outdoors over 48 hours to obtain a median value.

207

208 We conducted binary logistic regression to identify an association between potential risk factors for  
209 the following binary dependent variables: LFI at spirometry, asthma at spirometry, and wheezing in  
210 the last 12 months, and all 3 grouped together VS healthy children. We used Chi-square tests, Fisher's  
211 exact tests, Wilcoxon tests and Kruskal-Wallis tests to select independent variables with a P value  
212 <0.20, which were then included in a logistic regression model.

213 The explanatory variables tested included sex, age, body weight, height, floor material (cement/tiles),  
214 kitchen type, home tabaco smoking, home fish smoking fish, presence of pets at home, use of spray  
215 and aerosol, type of fuel, type of cooking equipment for cooking, household and outdoor PM<sub>2.5</sub> and  
216 PM<sub>10</sub>. Statistical analysis was performed using the R-Studio software.

217

### 218 **Analysis of qualitative data**

219 Thematic summaries were produced after transcribing the interviews and carrying out a thematic  
220 analysis following the themes predefined in the interview guide and allowing the salient themes to  
221 emerge from the data. Selected interview extracts and quotes were translated in English for the  
222 purpose of this publication; the accuracy of the translation was verified.

223

## 224 Ethical approval

225 The study protocol has been approved by the Côte d'Ivoire National Ethics Committee for Health and  
226 Life Sciences (CNESVS). In addition, the authorizations to launch the project were obtained from the  
227 local chiefdom.

228

## 229 Results

### 230 Population and living environment characteristics

231 We included 124 children from 65 households, of median age 7 years (IQR: 6 – 9), with 61 (49.2%) girls  
232 (Fig 1, Table 1). 47 children from 29 households had participated in the previous study (Kouao, 2020)  
233 [41]. An average of 7 persons (IQR: 5 – 10) lived in each household, 30 of them in a 1 or 2-room homes  
234 (46.2%) and 20 in 3-room homes (30.8%). 62 households lived in shared courtyards (95.4%). Flooring  
235 was cement for 44 households (67.7%) and tiles for 21 (32.3%). For 41 homes, the kitchen was located  
236 outside, in the yard (63.1%) and 10 homes had an indoor kitchen with no windows or ventilation  
237 system (15.4%). Sprays or aerosols such as mosquito repellents were used in 55 households (84.6%),  
238 and 16 households had a pet in the home (24.6%). 29 households reported smoking meat or fish in the  
239 backyard (44.6%), with 69% smoking few times a month and others, few times a year (Table 1).

240 **Table 1. Characteristic of household dwellings and pollutant concentration (N = 65)**

| Characteristics              | N* = 65   |                         |
|------------------------------|-----------|-------------------------|
|                              | N if ≠ N* | N (%) or Median (Q1-Q3) |
| Number of occupants in house |           | 7 (5 – 10)              |
| Number of rooms              |           |                         |
| 1 or 2                       |           | 30 (46.2)               |
| 3                            |           | 20 (30.8)               |

|                                         |    |           |
|-----------------------------------------|----|-----------|
| 4 or more                               |    | 15 (23.0) |
| Common courtyard                        |    | 62 (95.4) |
| Number of years lived in residence      |    |           |
| 1 to 5 years                            |    | 7 (10.8)  |
| > 5 years                               |    | 58 (89.2) |
| Floor material                          |    |           |
| Cement                                  |    | 44 (67.7) |
| Tiles                                   |    | 21 (32.3) |
| Soil                                    |    | 0         |
| Kitchen type :                          |    |           |
| Closed, with window/screen              |    | 14 (21.5) |
| Closed, windowless                      |    | 10 (15.4) |
| Unenclosed, in courtyard or corridor    |    | 41 (63.1) |
| Home tobacco smoker                     |    | 6 (9.2)   |
| Smoking fish or meat in house/courtyard |    |           |
| A few times a month                     | 29 | 20 (69.0) |
| A few times a year                      | 29 | 9 (31.0)  |
| Pets at home                            |    |           |
| Dog or cat                              | 16 | 14 (87.5) |
| Other : goats, mangosteen               | 16 | 2 (12.5)  |
| Use of sprays and aerosols in the home  |    | 55 (84.6) |
| Type of fuel used for cooking           |    |           |
| Gas only                                |    | 15 (23.1) |
| Gas and coal                            |    | 44 (67.7) |
| Gas, coal and wood                      |    | 6 (9.2)   |
| Cooking fire ignition                   |    |           |

|                                                  |    |                         |
|--------------------------------------------------|----|-------------------------|
| Hevea only                                       | 50 | 34 (68.0)               |
| Hevea and plants or paper                        | 50 | 4 (8.0)                 |
| Hevea and plastic                                | 50 | 9 (18.0)                |
| Plastic only                                     | 50 | 3 (6.0)                 |
| Type of cooking equipment for cooking            |    |                         |
| Gas cooker only                                  |    | 13 (20.0)               |
| Gas cooker and traditional oven                  |    | 49 (75.4)               |
| Gas cooker, traditional oven and Improved cooker |    | 2 (3.1)                 |
| Gas cooker and improved oven                     |    | 1 (1.5)                 |
| Indoor particulate matter concentration          |    |                         |
| PM <sub>10</sub> µg/m <sup>3</sup>               | 34 | 126.70 (95.91 – 178.57) |
| PM <sub>2.5</sub> µg/m <sup>3</sup>              | 34 | 60.85 (45.56 – 96.24)   |
| Outdoor particulate matter concentration         |    |                         |
| PM <sub>10</sub> µg/m <sup>3</sup>               | 28 | 113.45 (93.11 – 157.30) |
| PM <sub>2.5</sub> µg/m <sup>3</sup>              | 28 | 58.21 (45.14 – 82.01)   |

241

## 242 Exposure to air pollution

243 All households used gas as their daily cooking fuel. In addition, charcoal was used by 44 (67.7%)  
 244 households for cooking. No household used charcoal as its sole fuel, 15 (23.1%) households used gas  
 245 exclusively and 6 (9.2%) households used a mix of gas, charcoal and wood. In interviews parents  
 246 reported using both gas and charcoal, used as a complement to gas, either for the time it takes to  
 247 change the gas cylinder bottle, or for long-cooking dishes that consume a lot of gas. A traditional stove  
 248 was used in 51 homes (78.5%) for charcoal and 3 households reported using also an improved stove  
 249 (4.6%). For lighting cooking fires, 47 (94.0%) households said they used rubberwood; the second most  
 250 common method was plastic (32.0%) (Table 1).

251 The median household PM<sub>10</sub> concentration over 48 hours, measured indoor 34 households, was 126.7  
252 µg/m<sup>3</sup> (IQR: 82.7) and the median outdoor PM<sub>10</sub> concentration, measured in the common courtyard  
253 of 28 households was 113.4 µg/m<sup>3</sup> (IQR: 64.2). Corresponding PM<sub>2.5</sub> concentrations were 60.8 µg/m<sup>3</sup>  
254 (IQR: 50.7) and 58.2 µg/m<sup>3</sup> (IQR: 36.9), inside and outside the house, respectively (Table 1).

255

## 256 Respiratory health

257 According to parents, 39 (31.4%) children had presented wheezing in the chest or noisy breathing  
258 during their lifetime and 21 (16.9%) during the previous year; 27 (21.8%) had already have an asthma  
259 attack, 65 (52.4%) had had dry cough at night in the past 12 months, 36 (29.0%) complained of burning  
260 or watery eyes and 49 (39.5%) had a cough on a daily basis (Table 2). On the 124 children enrolled, 99  
261 were examined by a physician, 20 (20.0%) had cough on the day of examination, 14 (14%) reported  
262 chest pain (14.0%), 1 (1.0%) exertional dyspnea and 10 (10.0%) had rhinorrhea (Table 2).

263

264 **Table 2. Demographic and medical characteristics, clinical signs, vital parameters and prevalence of**  
265 **lung function impairment of children (N = 124)**

266

| Characteristics                                            | N if ≠ N* | N* =124<br>N (%) or Median<br>(IQR) |
|------------------------------------------------------------|-----------|-------------------------------------|
| Gender Girls                                               |           | 61 (49.2)                           |
| Age (years)                                                |           | 7 (6 - 9)                           |
| Weight (kilo)                                              | 99        | 24 (20 – 27)                        |
| Size (cm)                                                  | 99        | 123 (116 - 133)                     |
| Noisy breathing/whistling in the chest in the past (ISAAC) |           | 39 (31.4)                           |
| Noisy breathing/whistling in the chest (last 12 months)    | 39        | 21 (53.8)                           |

|                                                                    |               |              |
|--------------------------------------------------------------------|---------------|--------------|
| Wheezing attacks (last 12 months)                                  | 21            |              |
| None                                                               |               | 1 (4.8)      |
| 1 to 3                                                             |               | 14 (66.7)    |
| 4 to 12                                                            |               | 5 (23.8)     |
| More than 12                                                       |               | 1 (4.8)      |
| Sleep disturbed by wheezing (last 12 months)                       | 21            |              |
| Never                                                              |               | 4 (19.0)     |
| Less than one night a week                                         |               | 11 (52.4)    |
| One or more nights a week                                          |               | 6 (28.6)     |
| Speech limited to one or two words (last 12 months)                | 21            | 14 (66.7)    |
| Asthma attacks                                                     |               | 27 (21.8)    |
| Wheezing in the chest during or after exercise (last 12 months)    |               | 24 (19.3)    |
| Dry cough at night (last 12 months)                                |               | 65 (52.4)    |
| <b>Questions asked outside of the ISAAC questionnaire</b>          |               |              |
| Daily cough                                                        |               | 49 (39.5)    |
| Burning or watery eyes                                             |               | 36 (29.0)    |
| Throat irritation                                                  |               | 28 (22.6)    |
| History of pneumonia                                               |               | 11 (8.9)     |
| <b>Clinicals signs reported on the day of clinical examination</b> | <b>N = 99</b> |              |
| Cough nation                                                       |               | 20 (20.0)    |
| Chest pain                                                         |               | 14 (14.0)    |
| Effort dyspnea                                                     |               | 1 (1.0)      |
| Rhinorrhea                                                         |               | 10 (10.0)    |
| Heart rate (in 1 minute)                                           |               | 85 (74 - 92) |
| Breathing frequency (in 1 minute)                                  |               | 23 (20 - 26) |

|                                            |               |                  |
|--------------------------------------------|---------------|------------------|
| <b>Spirometry parameters</b>               | <b>N = 87</b> |                  |
| FVC in bronchodilatation pre-test          |               | 1.23 [0.98-1.53] |
| Abnormal FVC <80% theoretical value        |               | 60 (69.02)       |
| FEV1 in bronchodilatation pre-test         |               | 1.24 [0.98-1.52] |
| Abnormal FEV1 < 80% theoretical value      |               | 28 (32.2)        |
| FEV1/FVC in bronchodilatation pre-test     |               | 100 [100-100]    |
| Abnormal FEV1/FVC < 80% theoretical value  |               | 0                |
| PEF in bronchodilatation pre-test          |               | 3.89 [3.14-4.46] |
| Abnormal PEF <80% theoretical value        |               | 28 (32.2)        |
| FEF25-75 in bronchodilatation pre-test     |               | 2.68 [2.38-3.40] |
| Abnormal FEF-25-75 < 70% theoretical value |               | 14(16.1)         |
| Presence of LFI in spirometry              |               | 63 (72.4)        |
| Non reversible obstructive pattern         |               | 19 (21.8)        |
| Reversible obstructive pattern (asthma)    |               | 24 (27.6)        |
| Restrictive pattern                        |               | 20 (23.0)        |
| Mixed pattern                              |               | 0                |
| <b>Rint parameters</b>                     | <b>N = 12</b> |                  |
| Rint in bronchodilatation pre-test         |               | 0.72 [0.56-1.01] |
| Abnormal Rint pre                          |               | 1 (8.3)          |
| Presence of LFI in Rint                    |               | 0                |
| Reversible obstructive pattern (asthma)    |               | 0                |
| <b>Total LFI</b>                           | <b>N=99</b>   | <b>63 (63.6)</b> |

267 LFI = lung function impairment; FVC = forced vital capacity; IQR = interquartile range; FEV1 = forced  
 268 expiratory volume in one second; PEF = peak expiratory flow; FEF25-75 = forced expiratory flow at 25-  
 269 75%, Rint = Lung resistance due to iterative flow interruptions ; IQR = interquartile range

270 Overall, 87 (70.1%) children underwent a full spirometry with a test of reversibility to bronchodilators  
 271 (salbutamol) and 12 (9.7%) a Rint measurement. LFI was identified in 63 children who underwent  
 272 spirometry; 19 (21.8%) had non-reversible OVD, 24 (27.6%) reversible OVD (asthma) and 20 (23.0%)  
 273 RVD (Table 2). No child had a mixed disorder. No LFI was identified in children who underwent a Rint.  
 274 Among the children with an LFI, 28 (32.2%) had an abnormal FEV1 below the norm and 14 (16.1%) for  
 275 FEF25-75. There was no significant correlation between spirometric abnormalities and respiratory  
 276 symptoms and clinical signs (Table 3). Logistic regressions between the presence of LFI in children and  
 277 risk factors were not statistically significant.

278

279 **Table 3. Comparative data on demographic and medical characteristics, clinical signs and vital**  
 280 **parameters between children with a spirometry lung function impairment on spirometry and**  
 281 **children without these characteristics (N = 99)**

282

|                                                            | <b>N* = 99</b> | <b>N* = 36</b>          | <b>N* = 63</b>           |                            |
|------------------------------------------------------------|----------------|-------------------------|--------------------------|----------------------------|
| <b>Characteristics</b>                                     | <b>Overall</b> | <b>Healthy Children</b> | <b>Children with LFI</b> | <b>P-value<sup>2</sup></b> |
| Gender Girls                                               | 51 (51.5)      | 18 (50.0)               | 33 (52.4)                | 0.8                        |
| Age (years)                                                | 7 (6-9)        | 7 (5-8)                 | 8 (6-9)                  | 0.023                      |
| Weight (kilo)                                              | 24 (20-27)     | 23 (18-26)              | 25 (20-27)               | 0.11                       |
| Size (cm)                                                  | 123 (115-133)  | 121 (111-128)           | 126 (120-134)            | 0.024                      |
| <b>Part I ISAAC questionnaire</b>                          |                |                         |                          |                            |
| Noisy breathing/whistling in the chest in the past (ISAAC) | 36 (36.4)      | 14 (38.9)               | 22 (34.9)                | 0.7                        |
|                                                            | N=36           | N=14                    | N=22                     |                            |
| Noisy breathing/whistling in the chest (last 12 months)    | 19 (52.8)      | 9 (64.3)                | 10 (45.4)                | 0.3                        |



|                                                                 |           |           |           |      |
|-----------------------------------------------------------------|-----------|-----------|-----------|------|
| Wheezing attacks (last 12 months)                               | N=19      | N=9       | N=10      | 0.7  |
| None                                                            | 1 (5.3)   | 0         | 1 (10.0)  |      |
| 1 to 3                                                          | 12 (63.2) | 7 (77.8)  | 5 (50.0)  |      |
| 4 to 12                                                         | 5 (26.3)  | 2 (22.2)  | 3 (30.0)  |      |
| More than 12                                                    | 1 (5.3)   | 0         | 1 (10.0)  |      |
| Sleep disturbed by wheezing (last 12 months)                    | N=19      | N=9       | N=10      | 0.8  |
| Never                                                           | 3 (15.8)  | 2 (22.2)  | 1 (10.0)  |      |
| Less than one night a week                                      | 10 (52.6) | 4 (44.4)  | 6 (60.0)  |      |
| One or more nights a week                                       | 6 (31.6)  | 3 (33.3)  | 3 (30.0)  |      |
| Speech limited to one or two words (last 12 months)             | N=19      | N=9       | N=10      | >0.9 |
| 13 (68.4)                                                       | 6 (66.7)  | 7 (70.0)  |           |      |
| Asthma attacks                                                  | 25 (25.3) | 10 (27.8) | 15 (23.8) | 0.7  |
| Wheezing in the chest during or after exercise (last 12 months) | 21 (21.2) | 7 (19.4)  | 14 (22.2) | 0.7  |
| Dry cough at night (last 12 months)                             | 47 (47.5) | 16 (44.4) | 31 (49.2) | 0.6  |
| <b>Questions asked outside of the ISAAC questionnaire</b>       |           |           |           |      |
| Daily cough                                                     | 36 (36.4) | 14 (38.9) | 22 (34.9) | 0.7  |
| Burning or watery eyes                                          | 29 (29.3) | 9 (25.0)  | 20 (31.7) | 0.5  |
| Throat irritation                                               | 25 (25.2) | 8 (22.2)  | 17(26.9)  | 0.6  |

|                                                                    |                        |                        |                        |        |
|--------------------------------------------------------------------|------------------------|------------------------|------------------------|--------|
| History of pneumonia                                               | 10 (10.1)              | 6 (16.7)               | 4 (6.3)                | 0.2    |
| History of tuberculosis                                            | 0                      | 0                      | 0                      |        |
| <b>Clinicals signs reported on the day of clinical examination</b> |                        |                        |                        |        |
| Cough                                                              | 20 (20.20)             | 6 (16.7)               | 14 (22.22)             | 0.5    |
| Chest pain                                                         | 14 (14.14)             | 7 (19.4)               | 7 (11.11)              | 0.3    |
| Effort dyspnea                                                     | 1 (1.0)                | 1 (2.8)                | 0                      | 0.4    |
| Rhinorrhea                                                         | 10 (10.1)              | 1 (2.8)                | 9 (14.3)               | 0.088  |
| Heart rate (in 1 minute)                                           | 85 (74-92)             | 85 (72-96)             | 85 (74-92)             | >0.9   |
| Breathing frequency (in 1 minute)                                  | 23 (20-26)             | 23 (20-26)             | 24 (20-26)             | 0.9    |
| <b>Spirometry parameters</b>                                       | <b>N=87</b>            | <b>N=24</b>            | <b>N=63</b>            |        |
| FVC in bronchodilatation pre-test                                  | 1.23 (0.98-1.53)       | 1.45 (1.27-1.75)       | 1.11 (0.93-1.43)       | <0.001 |
| FEV1 in bronchodilatation pre-test                                 | 1.24 (0.98-1.52)       | 1.46 (1.25-1.75)       | 1.11 (0.93-1.45)       | <0.001 |
| FEV1/FVC in bronchodilatation pre-test                             | 116.00 (116.00-118.00) | 116.00 (116.00-118.00) | 116.00 (116.00-118.00) | 0.4    |
| PEF in bronchodilatation pre-test                                  | 3.89 (3.14-4.46)       | 4.15 (3.58-4.48)       | 3.57 (3.07-4.43)       | 0.052  |
| FEF25-75 in bronchodilatation pre-test                             | 2.68 (2.39-3.40)       | 2.78 (2.56-3.45)       | 2.60 (2.27-3.35)       | 0.2    |

<sup>2</sup>Chi-square test of independence; Fisher's exact test; Wilcoxon-Mann-Whitney test

N (%)or Median (IQR)

N if ≠ N\*

283

284

285 **Adult perceptions and knowledge of pollution**

286 **Understandings of air pollution and its sources**

287 Of 59 adults surveyed, 40 (67.8%) qualified their neighborhood as affected by air pollution (Table 4).

288

289 **Table 4. Adults' perception of air pollution (N=59)**

| Characteristics                             | N =*59    |
|---------------------------------------------|-----------|
|                                             | N (%)     |
| Neighborhood polluted by air pollution      | 40 (67.8) |
| Information on                              |           |
| Air pollution                               | 33 (55.9) |
| The health effects of air pollution         | 38 (64.4) |
| What to do about air pollution              | 16 (27.1) |
| Health impacts of air pollution             |           |
| No consequences                             | 5 (8.5)   |
| Few consequences                            | 8 (13.5)  |
| Strong consequence                          | 36 (61.0) |
| Very high impact                            | 8 (13.6)  |
| Don't know                                  | 2 (3.4)   |
| Impacts of air pollution on the environment |           |
| No consequences                             | 7 (11.9)  |
| Few consequences                            | 9 (15.2)  |
| Strong consequence                          | 31 (52.5) |
| Very high impact                            | 6 (10.2)  |
| Don't know                                  | 6 (10.2)  |

Sources identified as fairly or highly polluting

|                               |           |
|-------------------------------|-----------|
| Industries/plants             | 49 (83.0) |
| Dust                          | 47 (79.7) |
| Vehicles and transport        | 45 (76.3) |
| Garbage burning               | 41 (70.7) |
| Fish or meat smoking activity | 34 (57.6) |
| Open combustion fires         | 28 (47.5) |

---

290 \*6 non-respondents

291

292 During interviews, respondents identified air pollution as bad smells, or the presence of smoke: "No,  
293 *it doesn't spoil the air, there are no bad smells*" (interview 4) or again, about air pollution in the  
294 neighborhood: "... *there are no worries, there are no bad smells... It's nice here...*" (interview 7).  
295 Furthermore, air pollution was often confused with pollution in general, and water and soil pollution  
296 in particular. In the questionnaire, factories and industries were identified by 49 (83.0%) adults as  
297 having a strong or very strong impact on air pollution, dust was cited by 47 (79.7%), vehicles and  
298 transport by 45 (76.3%), garbage burning by 41 (70.7%), fish-smoking activities by 34 (57.6%) and open  
299 combustion fires by 28 (47.5%). These sources of air pollution were also mentioned in the interviews,  
300 as were cigarettes.

301

302 Most adults interviewed cited, as sources of air pollution, waste in the gutters, stagnant water  
303 circulating in the village and plastic waste: "*The waste there ... it's a problem we don't know where to*  
304 *remove it when there's too much, it goes into the gutter*" (interview 8).

305 Gas is gradually replacing some of the use of coal for financial or practical reasons: "*We know that*  
306 *wood is expensive, so we use coal, but now coal is expensive too, so we use a bit of gas.*" (interview 5),  
307 "*You know, in the courtyard, coal is just sometimes used for sauces, because sauces take a long time*

308 *and use a lot of gas, but otherwise it's just gas, you light it and it's hot, now we use gas, coal stove is*  
309 *tiring and coal costs a lot of money..." (interview 7).*

310

### 311 **Health consequences of air pollution**

312 Overall, 33 (55.9%) adults reported being informed about air pollution in general, 38 (64.4%) about the  
313 effects of air pollution on health, and 16 (27.1%) about protecting oneself from air pollution. Cough  
314 and runny nose were symptoms most often cited as the health consequences of air pollution: *"It's*  
315 *especially true for children, after they cough a lot, it gives them colds and even tires them out a lot. But*  
316 *yes, especially children, but when you're older, it's okay" (interview 5), "My children cough at night"*  
317 *(interview 8). Few respondents (13, 22.0%) felt that air pollution had little or no impact on their health.*  
318 Poor lifestyle habits and poor home maintenance were identified as the cause of air pollution by  
319 respondents: *"the air in the house is no longer aerated, it's no longer refined, so it becomes polluted"*  
320 *(interview 3), "As I said, it's good, we clean the house, we clean the yard and it's clean, there's no*  
321 *problem at home."* (interview 8), most often due to ignorance *"it's unconsciousness... there's literacy"*  
322 *(interview 1), "I think it's because they don't know, they don't know the importance of air" (interview*  
323 *3).*

324

### 325 **Environmental consequences of pollution**

326 In the questionnaire, 6 (10.2%) don't know air pollution effect on the environment. Environmental  
327 consequences of pollution were not mentioned in the interviews, but some cited the Banco forest as  
328 an important factor in air quality: *"It's the Banco itself that means there's less pollution, there's the*  
329 *forest, the forest consumes gas, there's the ecosystem. It also brings us rain, not to mention the sea*  
330 *and the ocean. If this forest is destroyed, it's all over... it would be a catastrophe..." (interview 1), "and*  
331 *then we're right on the edge of the Banco forest, where the air is still much cleaner than inside the*  
332 *neighborhood over there" (interview 3).*

333

### 334 Solutions to the problem of air pollution exposure

335 Solutions to the problem of air pollution are individual-level behavior change. The notion of keeping  
336 one's environment clean was very often mentioned: *"It's cleanliness that counts, and that's enough.*  
337 *Houses have to be clean."* (interview 1), *"Keeping the house clean is normal, you have to keep your*  
338 *house clean, I sweep the front yard every day..."* (interview 7). Several respondents suggested raising  
339 public awareness to start addressing the air pollution problem: *"We're going to raise awareness in the*  
340 *neighborhood so we can do a better job of all this"* (interview 6). They felt that it's also up to political  
341 leaders to take action to fight the problem: *"It's up to the politicians, not us, they have the money, they*  
342 *know what needs to be done, to find solutions..."* (interview 5).

343

### 344 Information on and prioritisation of pollution prevention

345 Solutions to the problem based on better knowledge that would be coming from more education and  
346 information. Participants explained that most of the information on pollution and health came from  
347 watching television, but that overall poor access to education and information on these topics led to  
348 limited knowledge: *"it's unconsciousness... there's literacy"* (interview 1), *"I think it's because they don't*  
349 *know, they don't know the importance of air"* (interview 3). Poor lifestyle habits and poor home  
350 maintenance were identified as the cause of air pollution: *"the air in the house is no longer aerated,*  
351 *it's no longer refined, so it becomes polluted"* (interview 3), *"As I said, it's good, we clean the house, we*  
352 *clean the yard and it's clean, there's no problem at home."* (interview 8).

353

### 354 Public interest

355 Air pollution is not a source of concern or interest for the population: *"They don't care at all, because*  
356 *if they did, if they did, everyone would make an effort to ensure good air quality. But they don't give a*  
357 *damn, it's how they're going to live from day to day that interests them, otherwise the rest..."*.  
358 (interview 3), *"We often live here, so we look at things but don't react, you have to manage, so you*

359 *don't think about it, you don't have to think about it because you have no choice, there are other*  
360 *concerns for the family" (interview 5), "Well, as I told you, I've lived through it, so it doesn't worry me,*  
361 *it's not something that prevents me from living or breathing. There are other things to think about"*  
362 (interview 6). The interviewees explained that the population faces many other problems that take  
363 priority over air pollution: *"So they're not worried about how they're going to earn a living so they can*  
364 *eat, that's all, if not how to improve the air, they don't give a damn" (interview 3), "You know, it's hard*  
365 *here, we're here but we don't know for when because it's expensive and you have to work and even if*  
366 *you work, your child is sick and you can't always find the medicine or the hospital" (interview 7). Data*  
367 on the perception of air pollution in adults are presented in Table 4.

368

## 369 **Children's perceptions and knowledge of pollution**

### 370 **Drawn elements**

371 Eight children took part in the "Draw and express yourself" activity (Fig 2). Children's representation  
372 of air pollution was mainly reflected in the presence of pollution sources in their drawings such as  
373 household waste on the ground or in the water (drawing 1), presence of burning tire (drawing 2), waste  
374 on the ground (drawing 7 and 8), and presence of smoke (drawings 1, 3 and 5). The main consequences  
375 of pollution were represented as the reduction of life forms, with fewer trees and flowers on the  
376 polluted drawing (drawings 1, 5, 7 and 8). The presence of human activity was represented by changes  
377 in the type and size of building shown: small house on the unpolluted drawing, large house on the  
378 polluted drawing (drawing 1, 5 and 7).

379

### 380 **Additional elements through speech**

381 In their drawings, children associated air pollution with dirt, the presence of garbage and the presence  
382 of smoke. The notion of unpleasant odors was added to the discourse. The children draw comparisons  
383 between different types of infrastructure: the most imposing and city-like being the most polluted:

384 *"City houses pollute much more than mud houses in villages"* (drawing 1), *"houses are replaced by*  
385 *buildings that pollute more"* (drawing 5), *"the house in the polluted drawing is a factory and the other*  
386 *a non-polluted shack"* (drawing 7). In addition, the notion of ventilation through house windows to  
387 keep the air unpolluted was expressed through speech (drawings 3 and 5). The notion of *"bad smells"*  
388 was also mentioned by the children during the oral explanation of their drawings (drawings 1, 5, 6 and  
389 8). Half of children considered air pollution to be a serious problem: *"it can kill"* (speech 1), *"you can*  
390 *get sick"* (speech 2), *"people will get sick"* (speech 5). Other children were unable to answer the  
391 question (children 4 and 8), and others did not consider air pollution to be a serious health issue  
392 (speeches 3, 6 and 7). Finally, only two children explained that air pollution is serious for the  
393 environment: *"it can kill plants"* (speech 3), *"people will get sick, animals, vegetation"* (speech 5).  
394 Discussions revealed that burning fuel such as wood or coal, especially for cooking, was also a source  
395 of air pollution: *"If you burn wood, it pollutes"* (speech 1), *"Smoke from coal in the house"* (speech 3),  
396 *"Coal makes you smoke, it pollutes the air"* (speech 5).  
397 The majority of children explained that they had heard about air pollution at school. One of the  
398 children mentioned having followed a course on pollution at school in second grade. This child  
399 produced the most changes on the drawing between the two landscapes, and was also able to provide  
400 the most sources, consequences and explanations on the subject orally.

401

## 402 Discussion

403 Exposure to air pollution was high in poorly living district of Abidjan, with PM<sub>2.5</sub> and PM<sub>10</sub>  
404 concentrations exceeding WHO recommendations. Multiple and significant sources of air pollution  
405 were identified, related to living conditions and the environment. The prevalence of respiratory  
406 symptoms was high among children, and spirometry results showed a high prevalence of LFI and  
407 asthma. Children and adults only perceive visible sources of air pollution. A lack of information on the  
408 subject was noted in the interviews.



409

410 Indoor and outdoor PM<sub>2.5</sub> and PM<sub>10</sub> concentrations exceeded WHO-recommended thresholds of 45  
411 µg/m<sup>3</sup> over 24h for PM<sub>10</sub>, and 15 µg/m<sup>3</sup> over 24h for PM<sub>2.5</sub> [42]. Looking at other measurements taken  
412 in Abidjan, the median PM<sub>10</sub> and PM<sub>2.5</sub> concentrations are 45.9 µg/m<sup>3</sup> and 20.5 µg/m<sup>3</sup> respectively [48–  
413 50]. The concentrations of PM at the study site in Andokoi were similar to those recorded in 2016 at  
414 the same location [41]. The various sources of pollution identified in the neighborhood and by the  
415 population, whether children or their parents, help us to understand that these populations are  
416 exposed, by the geography of the neighborhood, by the type of housing and the characteristics of the  
417 dwellings, but also and above all by cooking fires. These sources may explain why the Andokoi data are  
418 slightly higher than the city data and WHO recommendations. There is also little difference between  
419 pollution concentrations in homes and outdoors. This can be explained by the fact that homes are  
420 often open onto courtyards and have few rooms.

421

422 None of the households used biomass fuels exclusively. In comparison, during the 2016 Kouao study  
423 in the same Andokoi area, 15% of households used biomass fuel (wood or charcoal) exclusively for  
424 cooking [41]. Collecting annual data on PM concentrations in the neighborhood would enable us to  
425 identify whether the decrease in PM concentrations from 2016 to 2022 can be attributed to the change  
426 in the type of fuel used for cooking, or whether it depends on seasonality or other factors. Data from  
427 the adult interviews seem to confirm that coal is gradually being abandoned in favor of gas. It would  
428 be interesting to know the proportion of use between gas and coal for those using these two forms of  
429 fuel. Despite a change in cooking practices, pollutant levels remain high, which may explain the  
430 significant prevalence of respiratory disorders and symptoms among children.

431

432 Of the 124 children included, the prevalence of bronchial symptoms suggestive of asthma was high.  
433 The prevalence of wheezing in the chest during the year, a dry cough at night. The results are similar  
434 to those presented in the study of Kouao. In 2016, 19 children had wheezing in the last 12 months

435 (18.3%) and 45 had night-time wheezing (43.3%). Similarly, 21.8% of parents reported a previous  
436 asthma attack, compared with 18.3% in 2016 [41]. These results are far superior to other studies.

437 In Cameroon, in a study carried out in 2016, 182 pupils (7.6%) (CI 95% 6.5 - 8.6) had been wheezing for  
438 the previous 12 days [51]. In Djibouti, in a study carried out from 2014 to 2016, the prevalence of  
439 wheezing in the chest, wheezing on exertion and nocturnal dry cough in the ISAAC questionnaire were  
440 respectively 5.6% (CI 95% 4.3 - 6.4), 1.6% (CI 95% 0.8 - 1.9) and 7.8% (CI 95% 7.1 - 8.23) [52]. The  
441 presence of a LFI evaluated at respiratory function tests was very important. Because of the difficulty  
442 some children have in making spirometry curves correctly, and because of the variability of spirometry  
443 curves at these ages, it would be preferable not to take into account spirometric data exclusively.  
444 Prevalence may be slightly overestimated. Spirometry requires a very specific technique, which may  
445 not be possible in a single session. Several sessions could be envisaged to further guarantee this bias.  
446 We found no association between exposure to various sources of pollution and the presence of LFI or  
447 wheezing in the last 12 months. One possible explanation is that our sample size is small.

448  
449 The concept of air pollution remained fairly abstract for both children and adults interviewed in  
450 Yopougon. They associated air pollution with environmental pollution in general, and plastic pollution  
451 of water and soil in particular. Children cited, as in other studies, unpleasant odors and the presence  
452 of smoke as constitutive elements of air pollution, and the sources of pollution they most often cited  
453 were dust, biomass combustion and plastic waste, all visible elements [35,43,53]. In this study, below  
454 8 years old, children were not able to express their perceptions on the subject in drawings or orally.  
455 Beyond the age, a study carried out in the USA in 2021 showed that parents' level of education  
456 influences teenagers' perception of air pollution [54]. Air pollution is not a source of concern for the  
457 population, which puts financial problems first. In a study carried out in Beirut in 2016, the  
458 deterioration of air quality was not cited as the main risk perceived by the population living in the  
459 suburb, who were mainly sensitive to risks related to civil security, road traffic and terrorism. Risks

460 linked to pollution and environmental degradation only came in fourth place, almost equal with those  
461 linked to terrorism [55].

462

463 Both children and adults interviewed recognized an important role for human activities (transport,  
464 factories) and lifestyles (biomass combustion for cooking, garbage burning) as generating air pollution.  
465 According to the interviews, public policies are not seen as a solution to the city's air pollution  
466 problems. Moreover, since biomass combustion fires are only considered a source of strong or very  
467 strong air pollutants by half of all women, this raises the question of the exposure of children, who  
468 work at the backs of women while they're young, preparing meals. Few studies have focused on  
469 children's perceptions of air pollution in low- and middle-income countries, and it would be interesting  
470 to be able to compare these data with other neighborhoods or neighboring countries.

471

472 This study has several limitations. First, we restricted the study to households and children in one area  
473 of the commune of Yopougon, which is not representative of the whole commune, and of the whole  
474 city of Abidjan. A selection bias may also be present due to the fact that we did not have at our disposal  
475 the complete lists of households and children who participated in CHAIRPOL program in 2016-2017.  
476 Some households may therefore have been part of the previous study and be classified in our study as  
477 a new inclusion or vice versa. As our sample size is small (59 households and 117 children), we cannot  
478 generalize our results to the entire area but rather consider this study as a case study, hence the fact  
479 that it is a pilot study. The data collected may have been subject to recall bias, as we asked parents  
480 about their child's respiratory health from an early age. With regard to respiratory symptoms, the  
481 information gathered was not clinically verified. Prior knowledge of the exposure factors or  
482 pathologies concerned may influence the intensity of the search for exposure factors, or lead to further  
483 investigation of sick subjects. It would have been interesting to have been able to collect a certain  
484 amount of data on the respiratory health of parents to complement that of their children.

485

486 The strength of this work lies in its interdisciplinary and holistic approach, combining data from  
487 different perspectives and disciplines: public health, paediatric pulmonology, atmospheric physics and  
488 sociology. The different data sources were combined, using one type of data collected to compensate  
489 for the weakness of another, or to "check" the validity of the results. The aim of this method is to  
490 increase the quality of the results, to enrich understanding of the phenomenon studied and increase  
491 the reliability of the study, and finally to increase confidence in the validity of the results.

492

493 Using the validated ISAAC questionnaire, the children's respiratory health was assessed by determining  
494 the prevalence of bronchial symptoms suggestive of asthma, which were high in this population.  
495 Respiratory function test results confirmed the presence of ventilatory disorders and asthma in these  
496 children. Households are changing their habits in terms of the type of fuel used for cooking. Gas is  
497 gradually replacing the use of coal and wood, which is encouraging in terms of exposure to this source  
498 of pollution. Recommendations and awareness-raising for parents and children, starting at primary  
499 school level, are needed to limit the respiratory consequences for children of exposure to air pollution.  
500 In view of the results, schools would be the ideal medium for providing the most content on the subject  
501 of pollution, and air pollution in particular. The methodology implemented for this pilot project  
502 enabled us to gain a holistic view of the subject, and to draw lessons for future, larger-scale projects.

503

504

## 505 Acknowledgements

506 The authors would like to thank the study participants, families and children for their participation,  
507 and students who carried out the data collection and analysis. They express their gratitude to Professor  
508 Michael Fayon and Doctor Ida Viho for their interest in this subject and their support and the PACCI  
509 research center for the logistics and technical implementation of the study.

510 Conflicts of interest: no conflicts have been declared.



512

## 513 References

514

- 515 1. WHO. Pollution de l'air ambiant (extérieur) [Internet]. 2022 [cité 5 juin 2023]. Disponible sur:  
516 [https://www.who.int/fr/news-room/fact-sheets/detail/ambient-\(outdoor\)-air-quality-and-health](https://www.who.int/fr/news-room/fact-sheets/detail/ambient-(outdoor)-air-quality-and-health)
- 517 2. Urman R, McConnell R, Islam T, Avol EL, Lurmann FW, Vora H, et al. Associations of children's lung  
518 function with ambient air pollution: joint effects of regional and near-roadway pollutants. *Thorax*.  
519 juin 2014;69(6):540-7.
- 520 3. Rylance S, Nightingale R, Naunje A, Mbalume F, Jewell C, Balmes J, et al. Lung health and exposure  
521 to air pollution in Malawian children (CAPS): a cross-sectional study. *Thorax*. 29 août  
522 2019;74:thoraxjnl-2018.
- 523 4. Hayes R, Lim C, Zhang Y. PM2.5 air pollution and cause-specific cardiovascular disease mortality -  
524 PMC. 2020 [cité 26 juill 2022]; Disponible sur:  
525 <https://www.ncbi.nlm.nih.gov/pmc/articles/PMC7124502/>
- 526 5. WB, WHO, IRENA, IEA. THE ENERGY PROGRESS REPORT TRACKING SDG7 2023 [Internet]. 2023  
527 [cité 27 juin 2023]. Disponible sur: [https://cdn.who.int/media/docs/default-source/air-pollution-](https://cdn.who.int/media/docs/default-source/air-pollution-documents/air-quality-and-health/sdg7-report2023-full-report_web.pdf?sfvrsn=669e8626_3&download=true)  
528 [documents/air-quality-and-health/sdg7-report2023-full-](https://cdn.who.int/media/docs/default-source/air-pollution-documents/air-quality-and-health/sdg7-report2023-full-report_web.pdf?sfvrsn=669e8626_3&download=true)  
529 [report\\_web.pdf?sfvrsn=669e8626\\_3&download=true](https://cdn.who.int/media/docs/default-source/air-pollution-documents/air-quality-and-health/sdg7-report2023-full-report_web.pdf?sfvrsn=669e8626_3&download=true)
- 530 6. Gnamien S, Véronique Y, Liousse C, Ossohou M, Keita S, Bahino J, et al. Particulate Pollution in  
531 Korhogo and Abidjan (Cote d'Ivoire) during the Dry Season. *Aerosol Air Qual Res*. 1 janv 2020;20.
- 532 7. Monney UY, Diaby V, Bla BK, Konan ANKG, Yapo AF. Analyse socio-sanitaire du fumage de poisson  
533 dans la ville d'Abidjan (Côte d'Ivoire). *Int J Biol Chem Sci*. 2021;15(6):2337-48.
- 534 8. Brakema EA, Tabyshova A, Kasteleyn MJ, Molendijk E, van der Kleij RMJJ, van Boven JFM, et al.  
535 High COPD prevalence at high altitude: does household air pollution play a role? *Eur Respir J*. 7  
536 févr 2019;53(2):1801193.

- 537 9. McCarron A, Uny I, Caes L, Lucas SE, Semple S, Ardrey J, et al. Solid fuel users' perceptions of  
538 household solid fuel use in low- and middle-income countries: A scoping review. *Environ Int.* 1 oct  
539 2020;143:105991.
- 540 10. WHO. Pollution de l'air à l'intérieur des habitations et santé [Internet]. 2022 [cité 18 janv 2022].  
541 Disponible sur: [https://www.who.int/fr/news-room/fact-sheets/detail/household-air-pollution-](https://www.who.int/fr/news-room/fact-sheets/detail/household-air-pollution-and-health)  
542 [and-health](https://www.who.int/fr/news-room/fact-sheets/detail/household-air-pollution-and-health)
- 543 11. WHO. Report of the first meeting of the Strategic and Technical Advisory Group for  
544 Noncommunicable Diseases: virtual meeting, 27–28 October 2021 [Internet]. Geneva: World  
545 Health Organization; 2021 [cité 15 avr 2022]. Disponible sur:  
546 <https://apps.who.int/iris/handle/10665/352097>
- 547 12. WHO. WHO guidelines for indoor air quality: household fuel combustion [Internet]. Geneva: World  
548 Health Organization; 2014 [cité 15 avr 2022]. Disponible sur:  
549 <https://apps.who.int/iris/handle/10665/141496>
- 550 13. INSEE. Définition - Particules PM10 et PM2,5 [Internet]. 2021 [cité 2 août 2023]. Disponible sur:  
551 <https://www.insee.fr/fr/metadonnees/definition/c2196>
- 552 14. Tan WC, Qiu D, Liam BL, Ng TP, Lee SH, van Eeden SF, et al. The human bone marrow response to  
553 acute air pollution caused by forest fires. *Am J Respir Crit Care Med.* avr 2000;161(4 Pt 1):1213-7.
- 554 15. UNICEF. UNICEF France. 2021 [cité 12 mars 2022]. Les dangers de la pollution de l'air sur les  
555 enfants. Disponible sur: <https://www.unicef.fr/dossier/pollution-de-lair>
- 556 16. Sturm R. Theoretical models of carcinogenic particle deposition and clearance in children's lungs.  
557 *J Thorac Dis* [Internet]. 2012 [cité 24 mars 2022];4(4). Disponible sur:  
558 <https://jtd.amegroups.com/article/view/451>
- 559 17. Barnes BR. Behavioural Change, Indoor Air Pollution and Child Respiratory Health in Developing  
560 Countries: A Review. *Int J Environ Res Public Health.* mai 2014;11(5):4607-18.

- 561 18. WHO. Pollution de l'air et santé de l'enfant : prescrire un air sain : résumé [Internet]. Organisation  
562 mondiale de la Santé; 2018 [cité 18 janv 2022]. Report No.: WHO/CED/PHE/18.01. Disponible sur:  
563 <https://apps.who.int/iris/handle/10665/275547>
- 564 19. Smith K, McCracken J, Weber M, Hubbard A, Jenny A, Thompson L, et al. Effect of reduction in  
565 household air pollution on childhood pneumonia in Guatemala (RESPIRE): A randomised  
566 controlled trial. *Lancet*. 12 nov 2011;378:1717-26.
- 567 20. Kinney, lee, Asante. Prenatal and Postnatal Household Air Pollution Exposures and Pneumonia  
568 Risk: Evidence From the Ghana Randomized Air Pollution and Health Study. *Chest*. 1 nov  
569 2021;160(5):1634-44.
- 570 21. Lee AG, Kaali S, Quinn A, Delimini R, Burkart K, Opoku-Mensah J, et al. Prenatal Household Air  
571 Pollution Is Associated with Impaired Infant Lung Function with Sex-Specific Effects. Evidence from  
572 GRAPHS, a Cluster Randomized Cookstove Intervention Trial. *Am J Respir Crit Care Med*. 15 mars  
573 2019;199(6):738-46.
- 574 22. Mishra V. Indoor air pollution from biomass combustion and acute respiratory illness in preschool  
575 age children in Zimbabwe. *Int J Epidemiol*. oct 2003;32(5):847-53.
- 576 23. Rumchev K, Win T, Bertolatti D, Dhaliwal S. Prevalence of respiratory symptoms among children  
577 in rural Myanmar-disease burden assessment attributable to household biomass smoke. *Indoor*  
578 *Built Environ*. 1 août 2016;25(5):728-36.
- 579 24. Acharya P, Mishra SR, Berg-Beckhoff G. Solid fuel in kitchen and acute respiratory tract infection  
580 among under five children: evidence from Nepal demographic and health survey 2011. *J*  
581 *Community Health*. juin 2015;40(3):515-21.
- 582 25. Admasie A, Kumie A, Worku A. Children under Five from Houses of Unclean Fuel Sources and  
583 Poorly Ventilated Houses Have Higher Odds of Suffering from Acute Respiratory Infection in  
584 Wolaita-Sodo, Southern Ethiopia: A Case-Control Study. *J Environ Public Health*. 18 mars  
585 2018;2018:e9320603.



- 586 26. Yaya S, Bishwajit G. Burden of Acute Respiratory Infections Among Under-Five Children in Relation  
587 to Household Wealth and Socioeconomic Status in Bangladesh. *Trop Med Infect Dis*. 12 févr  
588 2019;4(1):E36.
- 589 27. Woolley KE, Bagambe T, Singh A, Avis WR, Kabera T, Weldetinsae A, et al. Investigating the  
590 Association between Wood and Charcoal Domestic Cooking, Respiratory Symptoms and Acute  
591 Respiratory Infections among Children Aged Under 5 Years in Uganda: A Cross-Sectional Analysis  
592 of the 2016 Demographic and Health Survey. *Int J Environ Res Public Health*. 4 juin  
593 2020;17(11):E3974.
- 594 28. Kirby MA, Nagel CL, Rosa G, Zambrano LD, Musafiri S, Ngirabega J de D, et al. Effects of a large-  
595 scale distribution of water filters and natural draft rocket-style cookstoves on diarrhea and acute  
596 respiratory infection: A cluster-randomized controlled trial in Western Province, Rwanda. *PLoS*  
597 *Med*. 3 juin 2019;16(6):e1002812.
- 598 29. Alexander DA, Northcross A, Karrison T, Morhasson-Bello O, Wilson N, Atalabi OM, et al. Pregnancy  
599 outcomes and ethanol cook stove intervention: A randomized-controlled trial in Ibadan, Nigeria.  
600 *Environ Int*. 1 févr 2018;111:152-63.
- 601 30. Demelash H, Motbainor A, Nigatu D, Gashaw K, Melese A. Risk factors for low birth weight in Bale  
602 zone hospitals, South-East Ethiopia : a case–control study. *BMC Pregnancy Childbirth*. 13 oct  
603 2015;15(1):264.
- 604 31. Institute for Health Metrics and Evaluation, Banque mondiale. Le coût de la pollution  
605 atmosphérique [Internet]. 2016 [cité 22 avr 2022]. Disponible sur:  
606 [https://openknowledge.worldbank.org/bitstream/handle/10986/25013/108141FRsum.pdf?sequ](https://openknowledge.worldbank.org/bitstream/handle/10986/25013/108141FRsum.pdf?sequence=10&isAllowed=y)  
607 [ence=10&isAllowed=y](https://openknowledge.worldbank.org/bitstream/handle/10986/25013/108141FRsum.pdf?sequence=10&isAllowed=y).
- 608 32. OCDE. Les conséquences économiques de la pollution de l’air extérieur [Internet]. OECD; 2016  
609 [cité 16 janv 2024]. Disponible sur: [https://www.oecd-ilibrary.org/environment/les-](https://www.oecd-ilibrary.org/environment/les-consequences-economiques-de-la-pollution-de-l-air-exterieur_9789264262294-fr)  
610 [consequences-economiques-de-la-pollution-de-l-air-exterieur\\_9789264262294-fr](https://www.oecd-ilibrary.org/environment/les-consequences-economiques-de-la-pollution-de-l-air-exterieur_9789264262294-fr)

- 611 33. OMS. Pollution de l'air intérieur des ménages au Burkina Faso [Internet]. 2021 [cité 16 janv 2024].  
612 Disponible sur: [https://iris.who.int/bitstream/handle/10665/351854/9789240023765-](https://iris.who.int/bitstream/handle/10665/351854/9789240023765-fre.pdf?sequence=1)  
613 [fre.pdf?sequence=1](https://iris.who.int/bitstream/handle/10665/351854/9789240023765-fre.pdf?sequence=1)
- 614 34. ONU. UNEP. 2019 [cité 18 janv 2022]. La pollution de l'air touche davantage les plus pauvres.  
615 Disponible sur: [http://www.unep.org/fr/actualites-et-recits/recit/la-pollution-de-lair-touche-](http://www.unep.org/fr/actualites-et-recits/recit/la-pollution-de-lair-touche-davantage-les-plus-pauvres)  
616 [davantage-les-plus-pauvres](http://www.unep.org/fr/actualites-et-recits/recit/la-pollution-de-lair-touche-davantage-les-plus-pauvres)
- 617 35. Bley D, Mbetoumou M, Noack Y, Robert S, Vernazza-Licht N. Perception de la pollution de l'air par  
618 les habitants du Cameroun et de France : convergences et divergences. Environ Risques Santé.  
619 2019;18(1):41-8.
- 620 36. Müller PE, Böni H. Les déchets solides municipaux en Afrique de l'Ouest : entre pratiques  
621 informelles, privatisation et amélioration du service public. 2012;7.
- 622 37. Brisoux L, Elgorriaga P. LES ENJEUX DE LA GESTION DES DECHETS A ABIDJAN La vitrine de la Côte  
623 d'Ivoire face aux défis de l'insalubrité [Internet]. 2018 [cité 9 mai 2022]. Disponible sur:  
624 [https://documents.plateforme-re-sources.org/wp-content/uploads/2018/07/A283-Gestion-des-](https://documents.plateforme-re-sources.org/wp-content/uploads/2018/07/A283-Gestion-des-dechets-a-Abidjan-comp.pdf)  
625 [dechets-a-Abidjan-comp.pdf](https://documents.plateforme-re-sources.org/wp-content/uploads/2018/07/A283-Gestion-des-dechets-a-Abidjan-comp.pdf)
- 626 38. Doumbia E, Liousse C, Corinne GL, Ndiaye S, Diop B, Ouafo M, et al. Real time black carbon  
627 measurements in West and Central Africa urban sites. Atmos Environ. 1 juill 2012;54:529-37.
- 628 39. Keita S, Liousse C, Assamoi EM, Doumbia T, N'Datchoh ET, Gnamien S, et al. African anthropogenic  
629 emissions inventory for gases and particles from 1990 to 2015. Earth Syst Sci Data. 29 juill  
630 2021;13(7):3691-705.
- 631 40. Djossou J, Léon JF, Akpo AB, Liousse C, Yoboué V, Bedou M, et al. Mass concentration, optical  
632 depth and carbon composition of particulate matter in the major southern West African cities of  
633 Cotonou (Benin) and Abidjan (Côte d'Ivoire). Atmospheric Chem Phys. 4 mai 2018;18(9):6275-91.
- 634 41. Kouao AKR. Exposure to indoor and outdoor air pollution among children under five years old in  
635 urban area. 2020;13.

- 636 42. Sako N, Beltrando G, Atta KL. Dynamique forestière et pression urbaine dans le Parc national du  
637 Banco (Abidjan, Côte d'Ivoire). 2013 [cité 27 juin 2023]; Disponible sur:  
638 <https://journals.openedition.org/vertigo/14127?lang=pt>
- 639 43. Lebaz S, Zarhbouch B, Picard D. Conceptions naïves de la pollution chez les enfants de 7 à 12 ans :  
640 une étude de leurs dessins. *Psychol Fr.* mars 2020;65(1):1-20.
- 641 44. Asher M, Keil U, Anderson H, Beasley R, Crane J, Martinez F, et al. International Study of Asthma  
642 and Allergies in Childhood (ISAAC): rationale and methods. *Eur Respir J.* 1 mars 1995;8(3):483-91.
- 643 45. Straus C, Similowski T. *Revue des Maladies Respiratoires*, Organe Officiel de la Société de  
644 Pneumologie de Langue Fr [Internet]. Elsevier Masson. 2006 [cité 22 août 2023]. 104 p. Disponible  
645 sur: [https://splf.fr/wp-content/uploads/2014/07/RMR2006\\_pftERS.pdf](https://splf.fr/wp-content/uploads/2014/07/RMR2006_pftERS.pdf)
- 646 46. Beydon N, Davis SD, Lombardi E, Allen JL, Arets HGM, Aurora P, et al. An Official American Thoracic  
647 Society/European Respiratory Society Statement: Pulmonary Function Testing in Preschool  
648 Children. *Am J Respir Crit Care Med.* 15 juin 2007;175(12):1304-45.
- 649 47. Merkus PJFM, Stocks J, Beydon N, Lombardi E, Jones M, Mckenzie SA, et al. Reference ranges for  
650 interrupter resistance technique: the Asthma UK Initiative. *Eur Respir J.* 1 juill 2010;36(1):157-63.
- 651 48. Gnamien S. CARACTERISATION DE LA POLLUTION PARTICULAIRE (PM10 ET PM2.5) A ABIDJAN ET  
652 KORHOGO (COTE D'IVOIRE) EN LIEN AVEC LA SANTE DES POPULATIONS. 2022; Disponible sur:  
653 [https://hal.science/tel-](https://hal.science/tel-03811519v1/file/Th%C3%A8se%20de%20Gnamien%20N%27Douffou%20Konan%20Sylvain.pdf)  
654 [03811519v1/file/Th%C3%A8se%20de%20Gnamien%20N%27Douffou%20Konan%20Sylvain.pdf](https://hal.science/tel-03811519v1/file/Th%C3%A8se%20de%20Gnamien%20N%27Douffou%20Konan%20Sylvain.pdf)
- 655 49. US Embassy L projet de l'indice mondial de la qualité de l'air. [aqicn.org](https://aqicn.org). [cité 12 janv 2024].  
656 Pollution de l'air à Abidjan US Embassy, Ivory Coast : Indice PM2.5 de la qualité de l'air (IQA) en  
657 temps réel. Disponible sur: <https://aqicn.org/city/ivory-coast/abidjan/us-embassy/fr/>
- 658 50. IQAir. Indice de Qualité de l'Air (IQA) à Abidjan et Pollution de l'Air en Côte d'Ivoire | IQAir  
659 [Internet]. 2024 [cité 12 janv 2024]. Disponible sur: <https://www.iqair.com/fr/ivory-coast/abidjan>
- 660 51. Mbatchou Ngahane BH, Ndonno GD, Kuaban C. Prévalence de l'asthme chez les adolescents en  
661 milieu scolaire au Cameroun. *Rev Mal Respir.* 31 janv 2017;34:A44-5.

- 662 52. Tabka Z, Aouichaoui C, Debbabi F, Ben Dhiab W, Trabelsi Y, Abar I. Prévalence de l'asthme et des  
663 symptômes évocateurs d'asthme chez l'enfant et l'adolescent Djiboutien. Rev Fr Allergol. 1 juin  
664 2020;60(4):359.
- 665 53. Guillen Gutierrez E, Lammel A, Meunier JM. Les enfants face aux menaces environnementales : la  
666 représentation de la pollution. Enfance. 2016;3(3):299-313.
- 667 54. Lynch KM, Mirabelli MC. Outdoor Air Quality Awareness, Perceptions, and Behaviors Among U.S.  
668 Children Aged 12–17 Years, 2015–2018. J Adolesc Health Off Publ Soc Adolesc Med. mai  
669 2021;68(5):882-7.
- 670 55. Khazen MA, Adjizian-Gerard J, Flanquart H. La perception de la pollution de l'air à Beyrouth. Territ  
671 En Mouv Rev Géographie Aménage Territ Mov J Geogr Plan [Internet]. 9 avr 2019 [cité 4 janv  
672 2023];(41). Disponible sur: <https://journals.openedition.org/tem/5279>
- 673

674 **Figures**

675

676 **Fig 1. Flow diagram of children and households included in the study, SEPOL-CI, 2022, Andokoi**

677

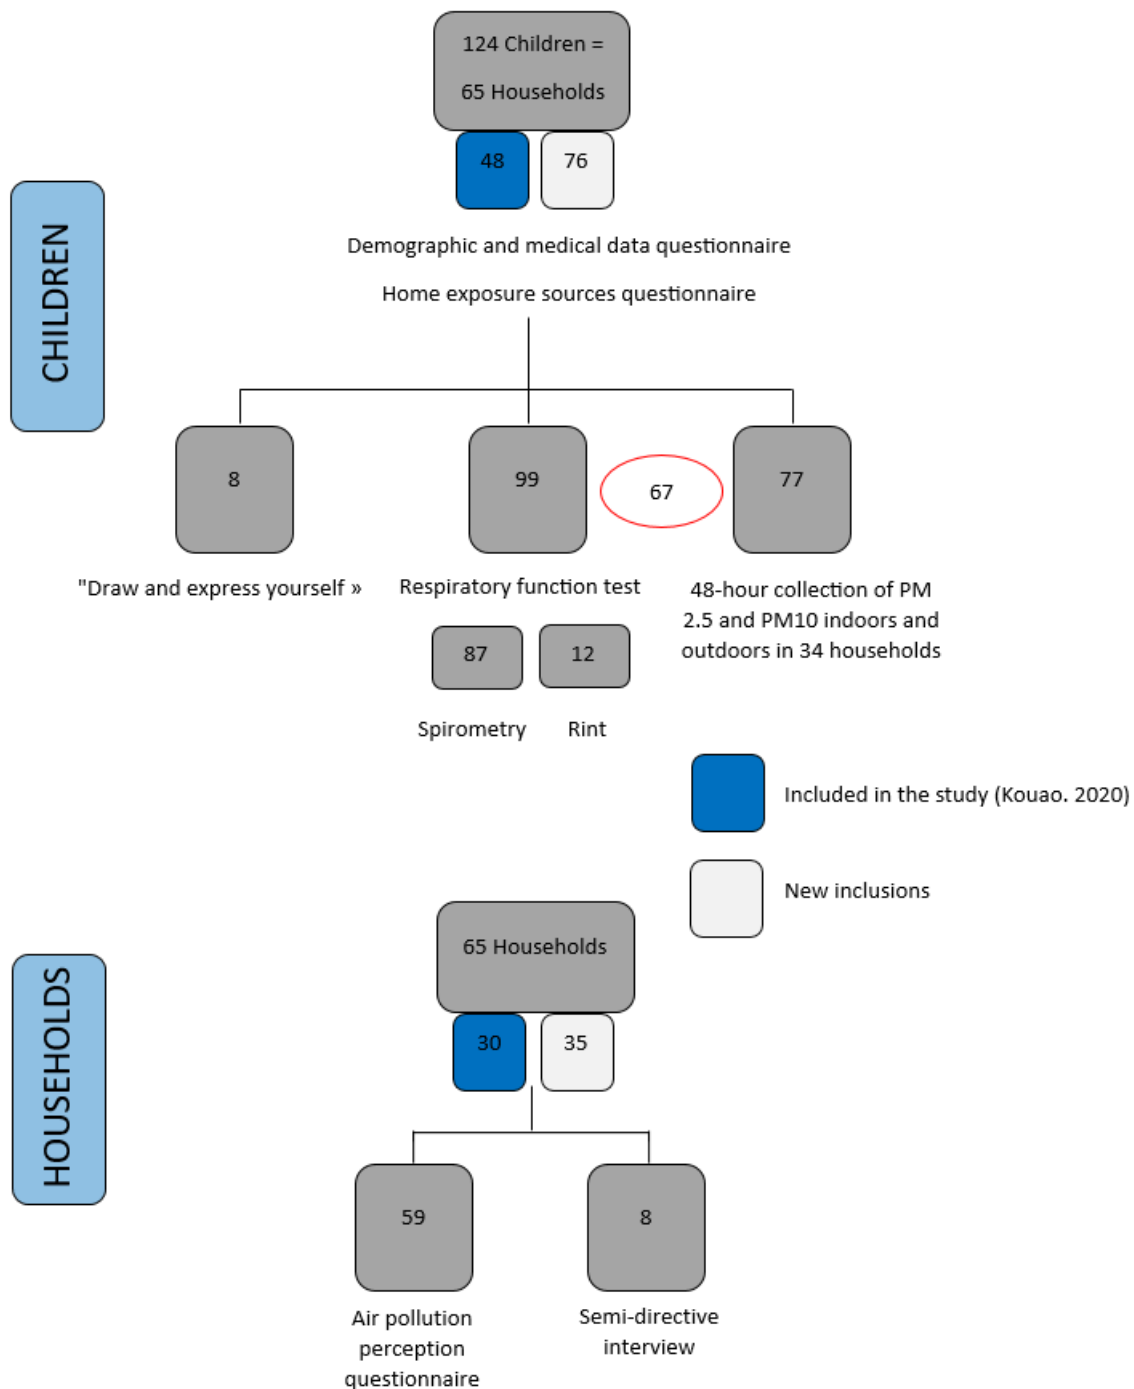

678

679

680

681 **Fig 2. Examples of children's work from the "Draw and express yourself" workshop, drawings 1, 2, 5**

682 **and 7, SEPol-CI, Andokoi, 2022**

683

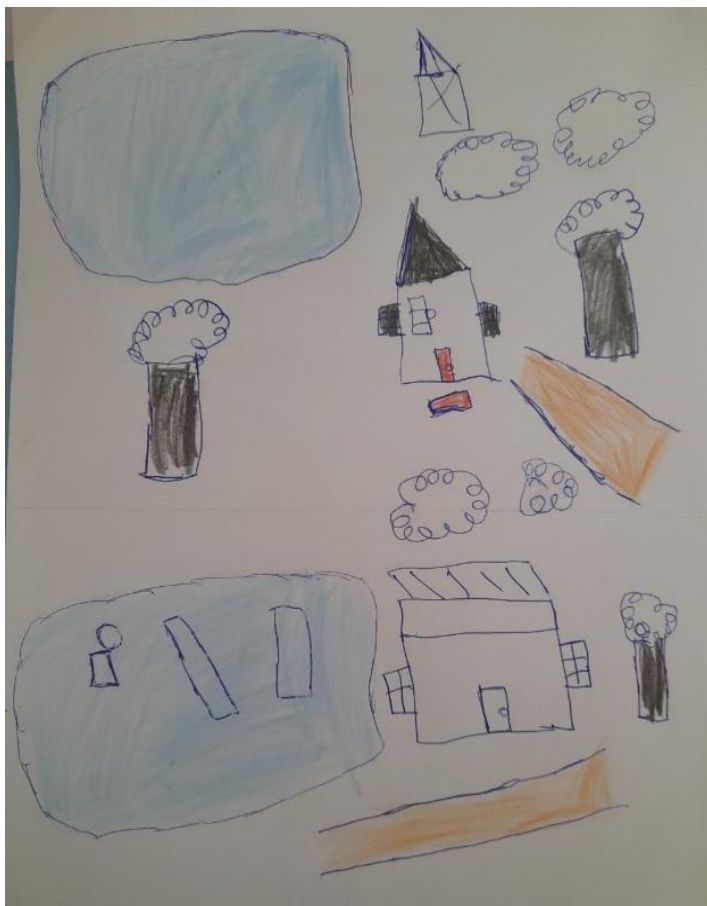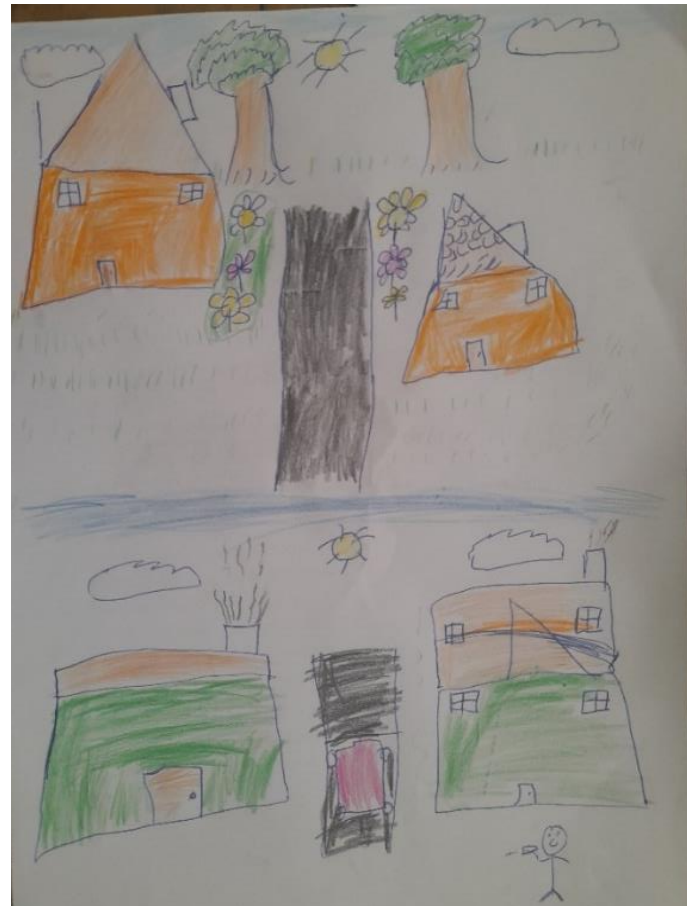

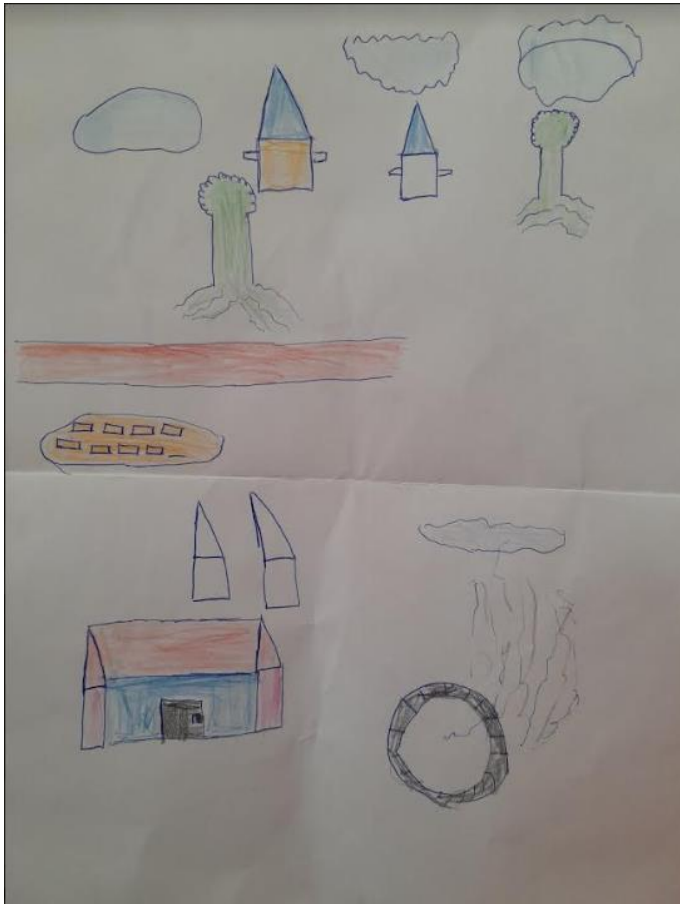

684

685

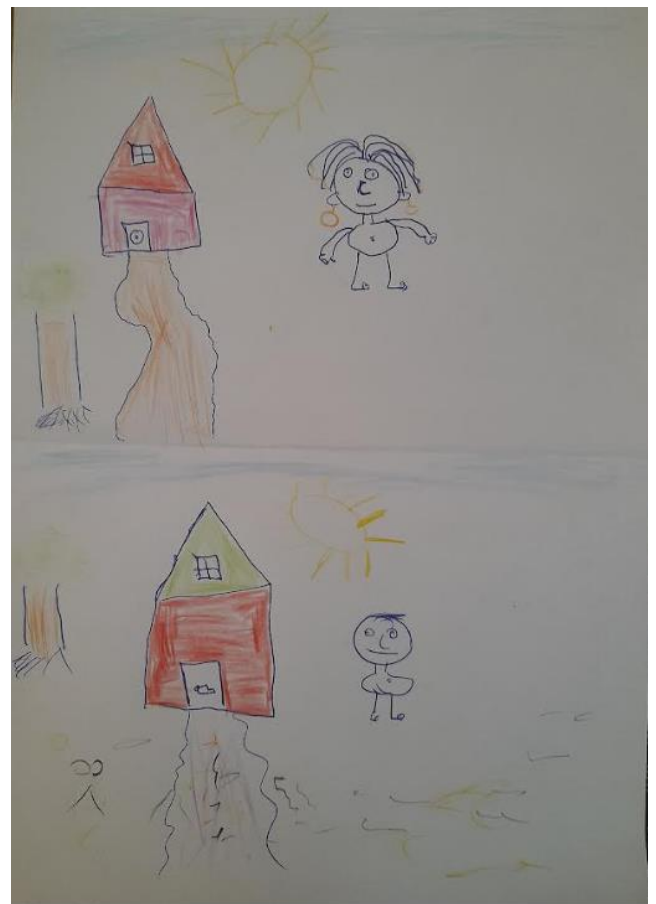

Source: https://medrxiv.org/content/10.1101/2024.08.23.24312492.full.pdf
